# Supplementary material
Source: publisher figshare collection journal article supplement (https://sage.figshare.com/ndownloader/files/14427527)
Supplement: Supplementary file 1 [file 14427527]

# **Supplementary file A: Complete Search Algorithms for the Seven Databases**

For each database, search terms was identified for Academic Achievement, the relevant Population and Recurrent Pain. The Boolean operator “and” linked together the three areas.

# CINAHL

# AcademicAchievement

(“academic achievement*” or ”academic overachievement*” or ”school achievement*” or ”scholastic achievement*” or ”mathematics achievement*” or ”reading achievement*” or ”science achievement*” or “student achievement*” or ”writing achievement*” or "literacy achievement*" or "cognitive achievement*" or “educational achievement*” or “learning achievement*” or “academic competence*” or ”academic over competence*” or ”school competence*” or ”scholastic competence*” or ”mathematics competence*” or ”reading competence*” or ”science competence*” or “student competence*” or ”writing competence*” or "literacy competence*" or "cognitive competence*" or “educational competence*” or “learning competence*” or “academic skills*” or ”academic over skills*” or ”school skills*” or ”scholastic skills*” or ”mathematics skills*” or ”reading skills*” or ”science skills*” or “student skills*” or ”writing skills” or "literacy skills" or "cognitive skills" or “educational skills” or “learning skills" or “academic outcome*” or ”school outcome*” or ”scholastic outcome*” or ”mathematics outcome*” or ”reading outcome*” or ”science outcome*” or “student outcome*” or ”writing outcome*” or "literacy outcome*" or "cognitive outcome*" or “educational outcome*”or “ learning outcome*” or “academic result*” or ”school result*” or ”scholastic result*” or ”mathematics result*” or ”reading result*” or ”science result*” or “student result*” or ”writing result*” or "literacy result*" or "cognitive result*" or “educational result*” or “learning results” or “academic performance*” or ”academic over performance*” or ”school performance*” or ”scholastic performance*” or ”mathematics performance*” or ”reading performance*” or ”science performance*” or “student performance*” or ”writing performance*” or "literacy performance*" or "cognitive performance*" or “educational performance*” or “academic attainment*” or ”school attainment*” or ”scholastic attainment*” or ”mathematics attainment*” or ”reading attainment*” or ”science attainment*” or “student attainment*” or ”writing attainment*” or "literacy attainment*" or "cognitive attainment*" or “educational attainment*” or “learning attainment*” or “academic characteristics*” or ”school characteristics*” or ”scholastic characteristics*” or ”mathematics characteristics*” or ”reading characteristics*” or ”science characteristics*” or “student characteristics*” or ”writing characteristics*” or "literacy characteristics*" or "cognitive characteristics*" or “educational characteristic*” or “learning characteristic*” or “academic capacity*” or ”scholastic capacity*” or ”mathematics capacity*” or ”reading capacity*” or ”science capacity*” or “student capacity*” or ”writing capacity*” or "literacy capacity*" or "cognitive capacity*" or “educational capacity*” or “learning capacity” or “academic ability” or ”school ability” or ”scholastic ability” or ”mathematics ability” or ”reading ability” or ”science ability” or “student ability” or ”writing ability” or "literacy ability" or "cognitive ability" or “educational ability” or “learning ability” or “academic improvement*” or ”school improvement*” or ”scholastic improvement*” or ”mathematics improvement*” or ”reading improvement*” or ”science improvement*” or “student improvement*” or ”writing improvement*” or "literacy improvement*" or "cognitive improvement*" or “educational improvement*” or “learning improvement*” or “academic gain*” or ”school gain*” or ”scholastic gain*” or ”mathematics gain*” or ”reading gain*” or ”science gain*” or “student gain*” or ”writing gain*” or "literacy gain*" or "cognitive gain*" or “educational gain*” or “learning gain*” or “academic success*” or ”school success*” or ”scholastic success*” or ”mathematics success*” or ”reading success*” or ”science success*” or “student success*” or ”writing success*” or "literacy success*" or “educational success*” or “learning success” or “academic failure*”or ”school failure*” or ”scholastic failure*” or ”mathematics failure*” or ”reading failure*” or ”science failure*” or “student failure*” or ”writing failure*” or "literacy failure*" or "cognitive failure*" or “educational failure*” or “learning failure” or “academic difficulties” or ”school difficulties” or ”scholastic difficulties” or ”mathematics difficulties” or ”reading difficulties” or ”science difficulties” or “student difficulties” or ”writing difficulties” or "literacy difficulties" or "cognitive difficulties" or “educational difficulties” or “learning difficulties” or “academic disorder*” or ”school disorder*” or ”scholastic disorder*” or ”mathematics disorder*” or ”reading disorder*” or ”science disorder*” or ”writing disorder*” or "literacy disorder*" or “educational disorder*” or “learning disorder*” or "underachievement" or "low achievement" or ”school completion” or ”school graduation” or “school dropout” or ”school retention” or “academic retention” or “academic learning*” or ”school learning*” or ”scholastic learning*” or ”mathematics learning*” or ”reading learning*” or ”science learning*” or “student learning*” or ”writing learning*” or "literacy learning*" or "cognitive learning*" or “educational learning*” or “academic record*” or ”school record*” or ”scholastic record*” or ”mathematics record*” or ”reading record*” or ”science record*” or “student record*” or ”writing record*” or "literacy record*" or "cognitive record*" or “academic test*” or ”school test*” or ”scholastic test*” or ”mathematics test*” or ”reading test*” or ”science test*” or “student test*” or ”writing test*” or "literacy test*" or "cognitive test*" or “educational test*” or “Achievement test*” or “competence test*” or “performance test*” or ”test scores” or ”achievement measures” or ”educational standards” or ”educational measurement” or ”grade point average” or ”knowledge level” or “school mark*” or ”graduation rates” or ”school attendance” or ”school truancy” or ”school phobia” or ”school absenteeism” or ”school refusal” or ”school non-attendance” OR MH "Academic Performance+/ED/PF")

Population

("kid" OR "kids" OR "kid's" OR "child" OR "childs" OR "child's" OR "children" OR "childhood" OR "child-hood" OR "schoolchild" OR "school-child" OR "schoolchilds" OR "school-childs" OR "schoolchild’s" OR "school-child's" OR "schoolchilden" OR "school-children" OR "juvenile" OR "preadolescent" OR "preadolescence" OR "preadolescents" OR "pre-adolescent" OR "pre-adolescence" OR "pre-adolescents" OR "Adolescent" OR "adolescence" OR "adolescent's" OR "adolescents" OR "youth" OR "youths" OR "teen" OR "teens" OR "teenage" OR "teen-age" OR "teenager" OR "teen-ager" OR "teenagers" OR "teen-agers" OR "schoolaged" OR "school-aged" OR "school-age" OR "schoolage" OR "compulsory-school" OR "kindergarten" OR "prekindergarten" OR "preschool" OR "preschoolers" OR "elementary-school" OR "grammar-school" OR "middle-school" OR "highschool" OR "high-school" OR "comprehensive-school" OR "secondary-school" OR "Intermediate-School" OR "Primary-School" OR "Nursery-School" OR "grade-6" OR "grade-six" OR "grade-7" OR "grade-seven" OR "grade-8" OR "grade-eight" OR "grade-9" OR "grade-nine" OR "grade-10" OR "grade-11" OR "grade-12" OR MH "Child+" OR MH "Adolescence+" OR MH "Schools, Middle/PF")

Pain

("Psychosomatic" OR "psychomatics" OR "somatoform" OR "somatisation" OR "somatization" OR "pain-disorder" OR "pain-disorders" OR "recurrent-pain" OR "recurrent-pains" OR "chronic-pain" OR "chronic-pains" OR "persistent-pain" OR "persistent-pains" OR "ache" OR "aches" OR "Abdominal-pain" OR "Abdominal-pains" OR "stomach-ache" OR "stomachache" OR "stomach-aches" OR "stomachaches" OR "bellyache" OR "belly-ache" OR "bellyaches" OR "headache" OR "headaches" OR "back-ache" OR "backache" OR "back-aches" OR "backaches" OR "back-pain" OR "back-pains" OR "musculoskeletal-pain" OR "musculoskeletal-pains" OR "musculoskeletal-symptom" OR "musculoskeletal-symptoms" OR "fibromyalgia" OR "fibromyalgias" OR "widespread-pain" or "Chronic Pain" OR "Fibromyalgia" OR "Headache" OR MH "Chronic Pain/EP/PC/PF/RF" OR MH "Back Pain+/EP/PC/PF/RF" OR MM "Headache/EP/PF/RF/PC" OR MM "Muscle Pain/RF/PF/PC/EP" OR MM "Neck Pain/RF/PF/PC/EP" OR MH "Abdominal Pain+")

Medline

# AcademicAchievement

(“academic achievement*” or ”academic overachievement*” or ”school achievement*” or ”scholastic achievement*” or ”mathematics achievement*” or ”reading achievement*” or ”science achievement*” or “student achievement*” or ”writing achievement*” or ”literacy achievement*” or ”cognitive achievement*" or “educational achievement*” or “learning achievement*” or “academic competence*” or ”academic over competence*” or ”school competence*” or ”scholastic competence*” or ”mathematics competence*” or ”reading competence*” or ”science competence*” or “student competence*” or ”writing competence*” or ”literacy competence*” or ”cognitive competence*" or “educational competence*” or “learning competence*” or “academic skills*” or ”academic over skills*” or ”school skills*” or ”scholastic skills*” or ”mathematics skills*” or ”reading skills*” or ”science skills*” or “student skills*” or ”writing skills” or ”literacy skills” or ”cognitive skills" or “educational skills” or “learning skills" or “academic outcome*” or ”school outcome*” or ”scholastic outcome*” or ”mathematics outcome*” or ”reading outcome*” or ”science outcome*” or “student outcome*” or ”writing outcome*” or ”literacy outcome*” or ”cognitive outcome*" or “educational outcome*”or “ learning outcome*” or “academic result*” or ”school result*” or ”scholastic result*” or ”mathematics result*” or ”reading result*” or ”science result*” or “student result*” or ”writing result*” or ”literacy result*” or ”cognitive result*" or “educational result*” or “learning results” or “academic performance*” or ”academic over performance*” or ”school performance*” or ”scholastic performance*” or ”mathematics performance*” or ”reading performance*” or ”science performance*” or “student performance*” or ”writing performance*” or ”literacy performance*” or ”cognitive performance*" or “educational performance*” or “academic attainment*” or ”school attainment*” or ”scholastic attainment*” or ”mathematics attainment*” or ”reading attainment*” or ”science attainment*” or “student attainment*” or ”writing attainment*” or ”literacy attainment*” or ”cognitive attainment*" or “educational attainment*” or “learning attainment*” or “academic characteristics*” or ”school characteristics*” or ”scholastic characteristics*” or ”mathematics characteristics*” or ”reading characteristics*” or ”science characteristics*” or “student characteristics*” or ”writing characteristics*” or ”literacy characteristics*” or ”cognitive characteristics*" or “educational characteristic*” or “learning characteristic*” or “academic capacity*” or ”scholastic capacity*” or ”mathematics capacity*” or ”reading capacity*” or ”science capacity*” or “student capacity*” or ”writing capacity*” or ”literacy capacity*” or ”cognitive capacity*" or “educational capacity*” or “learning capacity” or “academic ability” or ”school ability” or ”scholastic ability” or ”mathematics ability” or ”reading ability” or ”science ability” or “student ability” or ”writing ability” or ”literacy ability” or ”cognitive ability" or “educational ability” or “learning ability” or “academic improvement*” or ”school improvement*” or ”scholastic improvement*” or ”mathematics improvement*” or ”reading improvement*” or ”science improvement*” or “student improvement*” or ”writing improvement*” or ”literacy improvement*” or ”cognitive improvement*" or “educational improvement*” or “learning improvement*” or “academic gain*” or ”school gain*” or ”scholastic gain*” or ”mathematics gain*” or ”reading gain*” or ”science gain*” or “student gain*” or ”writing gain*” or ”literacy gain*” or ”cognitive gain*" or “educational gain*” or “learning gain*” or “academic success*” or ”school success*” or ”scholastic success*” or ”mathematics success*” or ”reading success*” or ”science success*” or “student success*” or ”writing success*” or ”literacy success*" or “educational success*” or “learning success” or “academic failure*”or ”school failure*” or ”scholastic failure*” or ”mathematics failure*” or ”reading failure*” or ”science failure*” or “student failure*” or ”writing failure*” or ”literacy failure*” or ”cognitive failure*" or “educational failure*” or “learning failure” or “academic difficulties” or ”school difficulties” or ”scholastic difficulties” or ”mathematics difficulties” or ”reading difficulties” or ”science difficulties” or “student difficulties” or ”writing difficulties” or ”literacy difficulties” or ”cognitive difficulties" or “educational difficulties” or “learning difficulties” or “academic disorder*” or ”school disorder*” or ”scholastic disorder*” or ”mathematics disorder*” or ”reading disorder*” or ”science disorder*” or ”writing disorder*” or ”literacy disorder*" or “educational disorder*” or “learning disorder*” or ”underachievement” or ”low achievement” or ”school completion” or ”school graduation” or “school dropout” or ”school retention” or “academic retention” or “academic learning*” or ”school learning*” or ”scholastic learning*” or ”mathematics learning*” or ”reading learning*” or ”science learning*” or “student learning*” or ”writing learning*” or ”literacy learning*” or ”cognitive learning*" or “educational learning*” or “academic record*” or ”school record*” or ”scholastic record*” or ”mathematics record*” or ”reading record*” or ”science record*” or “student record*” or ”writing record*” or ”literacy record*” or ”cognitive record*" or “academic test*” or ”school test*” or ”scholastic test*” or ”mathematics test*” or ”reading test*” or ”science test*” or “student test*” or ”writing test*” or ”literacy test*” or ”cognitive test*" or “educational test*” or “Achievement test*” or “competence test*” or “performance test*” or ”test scores” or ”achievement measures” or ”educational standards” or ”educational measurement” or ”grade point average” or ”knowledge level” or “school mark*” or ”graduation rates” or ”school attendance” or ”school truancy” or ”school phobia” or ”school absenteeism” or ”school refusal” or ”school non-attendance” ) OR "Absenteeism"[Mesh])

Population

("kid” or ”kids” or ”kid's” or ”child” or ”childs” or ”child's” or ”children” or ”childhood” or ”child-hood” or ”schoolchild” or ”school-child” or ”schoolchilds” or ”school-childs” or ”schoolchild’s” or ”school-child's” or ”schoolchilden” or ”school-children" OR "juvenile” or ”preadolescent” or ”preadolescence” or ”preadolescents” or ”pre-adolescent” or ”pre-adolescence” or ”pre-adolescents” or ”Adolescent” or ”adolescence” or ”adolescent's” or ”adolescents” or ”youth” or ”youths” or ”teen” or ”teens” or ”teenage” or ”teen-age” or ”teenager” or ”teen-ager” or ”teenagers” or ”teen-agers” or ”schoolaged” or ”school-aged” or ”school-age” or ”schoolage” or ”compulsory-school” or ”kindergarten” or ”prekindergarten” or ”preschool” or ”preschoolers” or ”elementary-school” or ”grammar-school” or ”middle-school” or ”highschool” or ”high-school” or ”comprehensive-school” or ”secondary-school” or ”Intermediate-School” or ”Primary-School” or ”Nursery-School” or ”grade-6” or ”grade-six” or ”grade-7” or ”grade-seven” or ”grade-8” or ”grade-eight” or ”grade-9” or ”grade-nine” or ”grade-10” or ”grade-11” or ”grade-12" OR Infant[Mesh:noexp] OR Child[Mesh] OR Adolescent[Mesh])

Pain

("Psychosomatic” or ”psychomatics” or ”somatoform” or ”somatisation” or ”somatization” or ”pain-disorder” or ”pain-disorders” or ”recurrent-pain” or ”recurrent-pains” or ”chronic-pain” or ”chronic-pains” or ”persistent-pain” or ”persistent-pains” or ”ache” or ”aches” or ”Abdominal-pain” or ”Abdominal-pains” or ”stomach-ache” or ”stomachache” or ”stomach-aches” or ”stomachaches” or ”bellyache” or ”belly-ache” or ”bellyaches” or ”headache” or ”headaches” or ”back-ache” or ”backache” or ”back-aches” or ”backaches” or ”back-pain” or ”back-pains” or ”musculoskeletal-pain” or ”musculoskeletal-pains” or ”musculoskeletal-symptom” or ”musculoskeletal-symptoms” or ”fibromyalgia” or ”fibromyalgias” or ”widespread-pain” or ”Chronic Pain" OR "Fibromyalgia” or ”Headache” or ”Psychosomatic Medicine"[Mesh] OR "Somatoform Disorders"[Mesh] OR "Abdominal Pain"[Mesh:noexp] OR "Headache Disorders, Primary "[Mesh] OR "Headache"[Mesh] OR "back pain "[Mesh] OR "Fibromyalgia"[Mesh])

ERIC

# AcademicAchievement

(“academic achievement*” or ”academic overachievement*” or ”school achievement*” or ”scholastic achievement*” or ”mathematics achievement*” or ”reading achievement*” or ”science achievement*” or “student achievement*” or ”writing achievement*” or "literacy achievement*" or "cognitive achievement*" or “educational achievement*” or “learning achievement*” or “academic competence*” or ”academic over competence*” or ”school competence*” or ”scholastic competence*” or ”mathematics competence*” or ”reading competence*” or ”science competence*” or “student competence*” or ”writing competence*” or "literacy competence*" or "cognitive competence*" or “educational competence*” or “learning competence*” or “academic skills*” or ”academic over skills*” or ”school skills*” or ”scholastic skills*” or ”mathematics skills*” or ”reading skills*” or ”science skills*” or “student skills*” or ”writing skills” or "literacy skills" or "cognitive skills" or “educational skills” or “learning skills" or “academic outcome*” or ”school outcome*” or ”scholastic outcome*” or ”mathematics outcome*” or ”reading outcome*” or ”science outcome*” or “student outcome*” or ”writing outcome*” or "literacy outcome*" or "cognitive outcome*" or “educational outcome*”or “ learning outcome*” or “academic result*” or ”school result*” or ”scholastic result*” or ”mathematics result*” or ”reading result*” or ”science result*” or “student result*” or ”writing result*” or "literacy result*" or "cognitive result*" or “educational result*” or “learning results” or “academic performance*” or ”academic over performance*” or ”school performance*” or ”scholastic performance*” or ”mathematics performance*” or ”reading performance*” or ”science performance*” or “student performance*” or ”writing performance*” or "literacy performance*" or "cognitive performance*" or “educational performance*” or “academic attainment*” or ”school attainment*” or ”scholastic attainment*” or ”mathematics attainment*” or ”reading attainment*” or ”science attainment*” or “student attainment*” or ”writing attainment*” or "literacy attainment*" or "cognitive attainment*" or “educational attainment*” or “learning attainment*” or “academic characteristics*” or ”school characteristics*” or ”scholastic characteristics*” or ”mathematics characteristics*” or ”reading characteristics*” or ”science characteristics*” or “student characteristics*” or ”writing characteristics*” or "literacy characteristics*" or "cognitive characteristics*" or “educational characteristic*” or “learning characteristic*” or “academic capacity*” or ”scholastic capacity*” or ”mathematics capacity*” or ”reading capacity*” or ”science capacity*” or “student capacity*” or ”writing capacity*” or "literacy capacity*" or "cognitive capacity*" or “educational capacity*” or “learning capacity” or “academic ability” or ”school ability” or ”scholastic ability” or ”mathematics ability” or ”reading ability” or ”science ability” or “student ability” or ”writing ability” or "literacy ability" or "cognitive ability" or “educational ability” or “learning ability” or “academic improvement*” or ”school improvement*” or ”scholastic improvement*” or ”mathematics improvement*” or ”reading improvement*” or ”science improvement*” or “student improvement*” or ”writing improvement*” or "literacy improvement*" or "cognitive improvement*" or “educational improvement*” or “learning improvement*” or “academic gain*” or ”school gain*” or ”scholastic gain*” or ”mathematics gain*” or ”reading gain*” or ”science gain*” or “student gain*” or ”writing gain*” or "literacy gain*" or "cognitive gain*" or “educational gain*” or “learning gain*” or “academic success*” or ”school success*” or ”scholastic success*” or ”mathematics success*” or ”reading success*” or ”science success*” or “student success*” or ”writing success*” or "literacy success*" or “educational success*” or “learning success” or “academic failure*”or ”school failure*” or ”scholastic failure*” or ”mathematics failure*” or ”reading failure*” or ”science failure*” or “student failure*” or ”writing failure*” or "literacy failure*" or "cognitive failure*" or “educational failure*” or “learning failure” or “academic difficulties” or ”school difficulties” or ”scholastic difficulties” or ”mathematics difficulties” or ”reading difficulties” or ”science difficulties” or “student difficulties” or ”writing difficulties” or "literacy difficulties" or "cognitive difficulties" or “educational difficulties” or “learning difficulties” or “academic disorder*” or ”school disorder*” or ”scholastic disorder*” or ”mathematics disorder*” or ”reading disorder*” or ”science disorder*” or ”writing disorder*” or "literacy disorder*" or “educational disorder*” or “learning disorder*” or "underachievement" or "low achievement" or ”school completion” or ”school graduation” or “school dropout” or ”school retention” or “academic retention” or “academic learning*” or ”school learning*” or ”scholastic learning*” or ”mathematics learning*” or ”reading learning*” or ”science learning*” or “student learning*” or ”writing learning*” or "literacy learning*" or "cognitive learning*" or “educational learning*” or “academic record*” or ”school record*” or ”scholastic record*” or ”mathematics record*” or ”reading record*” or ”science record*” or “student record*” or ”writing record*” or "literacy record*" or "cognitive record*" or “academic test*” or ”school test*” or ”scholastic test*” or ”mathematics test*” or ”reading test*” or ”science test*” or “student test*” or ”writing test*” or "literacy test*" or "cognitive test*" or “educational test*” or “Achievement test*” or “competence test*” or “performance test*” or ”test scores” or ”achievement measures” or ”educational standards” or ”educational measurement” or ”grade point average” or ”knowledge level” or “school mark*” or ”graduation rates” or ”school attendance” or ”school truancy” or ”school phobia” or ”school absenteeism” or ”school refusal” or ”school non-attendance” or (DE "Academic Achievement") AND (DE "Dropouts" OR DE "Low Achievement" OR DE "Underachievement") OR (DE "Grade Point Average"))

Population

("kid" OR "kids" OR "kid's" OR "child" OR "childs" OR "child's" OR "children" OR "childhood" OR "child-hood" OR "schoolchild" OR "school-child" OR "schoolchilds" OR "school-childs" OR "schoolchild’s" OR "school-child's" OR "schoolchilden" OR "school-children" OR "juvenile" OR "preadolescent" OR "preadolescence" OR "preadolescents" OR "pre-adolescent" OR "pre-adolescence" OR "pre-adolescents" OR "Adolescent" OR "adolescence" OR "adolescent's" OR "adolescents" OR "youth" OR "youths" OR "teen" OR "teens" OR "teenage" OR "teen-age" OR "teenager" OR "teen-ager" OR "teenagers" OR "teen-agers" OR ("schoolaged") OR ("school-aged") OR "school-age" OR "schoolage" OR "compulsory-school" OR "kindergarten" OR "prekindergarten" OR "preschool" OR "preschoolers" OR "elementary-school" OR "grammar-school" OR "middle-school" OR "highschool" OR "high-school" OR "comprehensive-school" OR "secondary-school" OR "Intermediate-School" OR "Primary-School" OR "Nursery-School" OR "grade-6" OR "grade-six" OR "grade-7" OR "grade-seven" OR "grade-8" OR "grade-eight" OR "grade-9" OR "grade-nine" OR "grade-10" OR "grade-11" OR "grade-12" OR (DE "young children") or (DE "junior high school students") or (DE "children) or (DE “preadolescents") or (DE "adolescents") or (DE "elementary school students") or (DE "middle school students") or (DE "high school students") or (DE "youth") OR (DE "junior high schools") or (DE "middle schools") or (DE "elementary schools") or (DE "secondary schools") or (DE "high schools") or (DE "grade 5") or (DE "grade 6") or (DE "grade 7") or (DE "grade 8") or (DE "grade 9"))

Pain

("Psychosomatic" OR "psychomatics" OR "somatoform" OR "somatisation" OR "somatization" OR "pain-disorder" OR "pain-disorders" OR "recurrent-pain" OR "recurrent-pains" OR "chronic-pain" OR "chronic-pains" OR "persistent-pain" OR "persistent-pains" OR "ache" OR "aches" OR "Abdominal-pain" OR "Abdominal-pains" OR "stomach-ache" OR "stomachache" OR "stomach-aches" OR "stomachaches" OR "bellyache" OR "belly-ache" OR "bellyaches" OR "headache" OR "headaches" OR "back-ache" OR "backache" OR "back-aches" OR "backaches" OR "back-pain" OR "back-pains" OR "musculoskeletal-pain" OR "musculoskeletal-pains" OR "musculoskeletal-symptom" OR "musculoskeletal-symptoms" OR "fibromyalgia" OR "fibromyalgias" OR "widespread-pain" or "Chronic Pain" OR "Fibromyalgia" OR "Headache" OR (DE "psychosomatic disorders”) or (DE "pain"))

Soc-INDEX

AcademicAchievement

(“academic achievement*” or ”academic overachievement*” or ”school achievement*” or ”scholastic achievement*” or ”mathematics achievement*” or ”reading achievement*” or ”science achievement*” or “student achievement*” or ”writing achievement*” or "literacy achievement*" or "cognitive achievement*" or “educational achievement*” or “learning achievement*” or “academic competence*” or ”academic over competence*” or ”school competence*” or ”scholastic competence*” or ”mathematics competence*” or ”reading competence*” or ”science competence*” or “student competence*” or ”writing competence*” or "literacy competence*" or "cognitive competence*" or “educational competence*” or “learning competence*” or “academic skills*” or ”academic over skills*” or ”school skills*” or ”scholastic skills*” or ”mathematics skills*” or ”reading skills*” or ”science skills*” or “student skills*” or ”writing skills” or "literacy skills" or "cognitive skills" or “educational skills” or “learning skills" or “academic outcome*” or ”school outcome*” or ”scholastic outcome*” or ”mathematics outcome*” or ”reading outcome*” or ”science outcome*” or “student outcome*” or ”writing outcome*” or "literacy outcome*" or "cognitive outcome*" or “educational outcome*”or “ learning outcome*” or “academic result*” or ”school result*” or ”scholastic result*” or ”mathematics result*” or ”reading result*” or ”science result*” or “student result*” or ”writing result*” or "literacy result*" or "cognitive result*" or “educational result*” or “learning results” or “academic performance*” or ”academic over performance*” or ”school performance*” or ”scholastic performance*” or ”mathematics performance*” or ”reading performance*” or ”science performance*” or “student performance*” or ”writing performance*” or "literacy performance*" or "cognitive performance*" or “educational performance*” or “academic attainment*” or ”school attainment*” or ”scholastic attainment*” or ”mathematics attainment*” or ”reading attainment*” or ”science attainment*” or “student attainment*” or ”writing attainment*” or "literacy attainment*" or "cognitive attainment*" or “educational attainment*” or “learning attainment*” or “academic characteristics*” or ”school characteristics*” or ”scholastic characteristics*” or ”mathematics characteristics*” or ”reading characteristics*” or ”science characteristics*” or “student characteristics*” or ”writing characteristics*” or "literacy characteristics*" or "cognitive characteristics*" or “educational characteristic*” or “learning characteristic*” or “academic capacity*” or ”scholastic capacity*” or ”mathematics capacity*” or ”reading capacity*” or ”science capacity*” or “student capacity*” or ”writing capacity*” or "literacy capacity*" or "cognitive capacity*" or “educational capacity*” or “learning capacity” or “academic ability” or ”school ability” or ”scholastic ability” or ”mathematics ability” or ”reading ability” or ”science ability” or “student ability” or ”writing ability” or "literacy ability" or "cognitive ability" or “educational ability” or “learning ability” or “academic improvement*” or ”school improvement*” or ”scholastic improvement*” or ”mathematics improvement*” or ”reading improvement*” or ”science improvement*” or “student improvement*” or ”writing improvement*” or "literacy improvement*" or "cognitive improvement*" or “educational improvement*” or “learning improvement*” or “academic gain*” or ”school gain*” or ”scholastic gain*” or ”mathematics gain*” or ”reading gain*” or ”science gain*” or “student gain*” or ”writing gain*” or "literacy gain*" or "cognitive gain*" or “educational gain*” or “learning gain*” or “academic success*” or ”school success*” or ”scholastic success*” or ”mathematics success*” or ”reading success*” or ”science success*” or “student success*” or ”writing success*” or "literacy success*" or “educational success*” or “learning success” or “academic failure*”or ”school failure*” or ”scholastic failure*” or ”mathematics failure*” or ”reading failure*” or ”science failure*” or “student failure*” or ”writing failure*” or "literacy failure*" or "cognitive failure*" or “educational failure*” or “learning failure” or “academic difficulties” or ”school difficulties” or ”scholastic difficulties” or ”mathematics difficulties” or ”reading difficulties” or ”science difficulties” or “student difficulties” or ”writing difficulties” or "literacy difficulties" or "cognitive difficulties" or “educational difficulties” or “learning difficulties” or “academic disorder*” or ”school disorder*” or ”scholastic disorder*” or ”mathematics disorder*” or ”reading disorder*” or ”science disorder*” or ”writing disorder*” or "literacy disorder*" or “educational disorder*” or “learning disorder*” or "underachievement" or "low achievement" or ”school completion” or ”school graduation” or “school dropout” or ”school retention” or “academic retention” or “academic learning*” or ”school learning*” or ”scholastic learning*” or ”mathematics learning*” or ”reading learning*” or ”science learning*” or “student learning*” or ”writing learning*” or "literacy learning*" or "cognitive learning*" or “educational learning*” or “academic record*” or ”school record*” or ”scholastic record*” or ”mathematics record*” or ”reading record*” or ”science record*” or “student record*” or ”writing record*” or "literacy record*" or "cognitive record*" or “academic test*” or ”school test*” or ”scholastic test*” or ”mathematics test*” or ”reading test*” or ”science test*” or “student test*” or ”writing test*” or "literacy test*" or "cognitive test*" or “educational test*” or “Achievement test*” or “competence test*” or “performance test*” or ”test scores” or ”achievement measures” or ”educational standards” or ”educational measurement” or ”grade point average” or ”knowledge level” or “school mark*” or ”graduation rates” or ”school attendance” or ”school truancy” or ”school phobia” or ”school absenteeism” or ”school refusal” or ”school non-attendance” OR DE "ACADEMIC achievement" OR DE "SCHOOL dropouts")

Population

("kid" OR "kids" OR "kid's" OR "child" OR "childs" OR "child's" OR "children" OR "childhood" OR "child-hood" OR "schoolchild" OR "school-child" OR "schoolchilds" OR "school-childs" OR "schoolchild’s" OR "school-child's" OR "schoolchilden" OR "school-children" OR "juvenile" OR "preadolescent" OR "preadolescence" OR "preadolescents" OR "pre-adolescent" OR "pre-adolescence" OR "pre-adolescents" OR "Adolescent" OR "adolescence" OR "adolescent's" OR "adolescents" OR "youth" OR "youths" OR "teen" OR "teens" OR "teenage" OR "teen-age" OR "teenager" OR "teen-ager" OR "teenagers" OR "teen-agers" OR "schoolaged" OR "school-aged" OR "school-age" OR "schoolage" OR "compulsory-school" OR "kindergarten" OR "prekindergarten" OR "preschool" OR "preschoolers" OR "elementary-school" OR "grammar-school" OR "middle-school" OR "highschool" OR "high-school" OR "comprehensive-school" OR "secondary-school" OR "Intermediate-School" OR "Primary-School" OR "Nursery-School" OR "grade-6" OR "grade-six" OR "grade-7" OR "grade-seven" OR "grade-8" OR "grade-eight" OR "grade-9" OR "grade-nine" OR "grade-10" OR "grade-11" OR "grade-12" OR DE "CHILDREN" OR DE "TEENAGERS")

Pain

("Psychosomatic" OR "psychomatics" OR "somatoform" OR "somatisation" OR "somatization" OR "pain-disorder" OR "pain-disorders" OR "recurrent-pain" OR "recurrent-pains" OR "chronic-pain" OR "chronic-pains" OR "persistent-pain" OR "persistent-pains" OR "ache" OR "aches" OR "Abdominal-pain" OR "Abdominal-pains" OR "stomach-ache" OR "stomachache" OR "stomach-aches" OR "stomachaches" OR "bellyache" OR "belly-ache" OR "bellyaches" OR "headache" OR "headaches" OR "back-ache" OR "backache" OR "back-aches" OR "backaches" OR "back-pain" OR "back-pains" OR "musculoskeletal-pain" OR "musculoskeletal-pains" OR "musculoskeletal-symptom" OR "musculoskeletal-symptoms" OR "fibromyalgia" OR "fibromyalgias" OR "widespread-pain" or "Chronic Pain" OR "Fibromyalgia" OR "Headache" OR DE "PAIN")

PsycINFO

AcademicAchievement

(“academic achievement*” or ”academic overachievement*” or ”school achievement*” or ”scholastic achievement*” or ”mathematics achievement*” or ”reading achievement*” or ”science achievement*” or “student achievement*” or ”writing achievement*” or "literacy achievement*" or "cognitive achievement*" or “educational achievement*” or “learning achievement*” or “academic competence*” or ”academic over competence*” or ”school competence*” or ”scholastic competence*” or ”mathematics competence*” or ”reading competence*” or ”science competence*” or “student competence*” or ”writing competence*” or "literacy competence*" or "cognitive competence*" or “educational competence*” or “learning competence*” or “academic skills*” or ”academic over skills*” or ”school skills*” or ”scholastic skills*” or ”mathematics skills*” or ”reading skills*” or ”science skills*” or “student skills*” or ”writing skills” or "literacy skills" or "cognitive skills" or “educational skills” or “learning skills" or “academic outcome*” or ”school outcome*” or ”scholastic outcome*” or ”mathematics outcome*” or ”reading outcome*” or ”science outcome*” or “student outcome*” or ”writing outcome*” or "literacy outcome*" or "cognitive outcome*" or “educational outcome*”or “ learning outcome*” or “academic result*” or ”school result*” or ”scholastic result*” or ”mathematics result*” or ”reading result*” or ”science result*” or “student result*” or ”writing result*” or "literacy result*" or "cognitive result*" or “educational result*” or “learning results” or “academic performance*” or ”academic over performance*” or ”school performance*” or ”scholastic performance*” or ”mathematics performance*” or ”reading performance*” or ”science performance*” or “student performance*” or ”writing performance*” or "literacy performance*" or "cognitive performance*" or “educational performance*” or “academic attainment*” or ”school attainment*” or ”scholastic attainment*” or ”mathematics attainment*” or ”reading attainment*” or ”science attainment*” or “student attainment*” or ”writing attainment*” or "literacy attainment*" or "cognitive attainment*" or “educational attainment*” or “learning attainment*” or “academic characteristics*” or ”school characteristics*” or ”scholastic characteristics*” or ”mathematics characteristics*” or ”reading characteristics*” or ”science characteristics*” or “student characteristics*” or ”writing characteristics*” or "literacy characteristics*" or "cognitive characteristics*" or “educational characteristic*” or “learning characteristic*” or “academic capacity*” or ”scholastic capacity*” or ”mathematics capacity*” or ”reading capacity*” or ”science capacity*” or “student capacity*” or ”writing capacity*” or "literacy capacity*" or "cognitive capacity*" or “educational capacity*” or “learning capacity” or “academic ability” or ”school ability” or ”scholastic ability” or ”mathematics ability” or ”reading ability” or ”science ability” or “student ability” or ”writing ability” or "literacy ability" or "cognitive ability" or “educational ability” or “learning ability” or “academic improvement*” or ”school improvement*” or ”scholastic improvement*” or ”mathematics improvement*” or ”reading improvement*” or ”science improvement*” or “student improvement*” or ”writing improvement*” or "literacy improvement*" or "cognitive improvement*" or “educational improvement*” or “learning improvement*” or “academic gain*” or ”school gain*” or ”scholastic gain*” or ”mathematics gain*” or ”reading gain*” or ”science gain*” or “student gain*” or ”writing gain*” or "literacy gain*" or "cognitive gain*" or “educational gain*” or “learning gain*” or “academic success*” or ”school success*” or ”scholastic success*” or ”mathematics success*” or ”reading success*” or ”science success*” or “student success*” or ”writing success*” or "literacy success*" or “educational success*” or “learning success” or “academic failure*”or ”school failure*” or ”scholastic failure*” or ”mathematics failure*” or ”reading failure*” or ”science failure*” or “student failure*” or ”writing failure*” or "literacy failure*" or "cognitive failure*" or “educational failure*” or “learning failure” or “academic difficulties” or ”school difficulties” or ”scholastic difficulties” or ”mathematics difficulties” or ”reading difficulties” or ”science difficulties” or “student difficulties” or ”writing difficulties” or "literacy difficulties" or "cognitive difficulties" or “educational difficulties” or “learning difficulties” or “academic disorder*” or ”school disorder*” or ”scholastic disorder*” or ”mathematics disorder*” or ”reading disorder*” or ”science disorder*” or ”writing disorder*” or "literacy disorder*" or “educational disorder*” or “learning disorder*” or "underachievement" or "low achievement" or ”school completion” or ”school graduation” or “school dropout” or ”school retention” or “academic retention” or “academic learning*” or ”school learning*” or ”scholastic learning*” or ”mathematics learning*” or ”reading learning*” or ”science learning*” or “student learning*” or ”writing learning*” or "literacy learning*" or "cognitive learning*" or “educational learning*” or “academic record*” or ”school record*” or ”scholastic record*” or ”mathematics record*” or ”reading record*” or ”science record*” or “student record*” or ”writing record*” or "literacy record*" or "cognitive record*" or “academic test*” or ”school test*” or ”scholastic test*” or ”mathematics test*” or ”reading test*” or ”science test*” or “student test*” or ”writing test*” or "literacy test*" or "cognitive test*" or “educational test*” or “Achievement test*” or “competence test*” or “performance test*” or ”test scores” or ”achievement measures” or ”educational standards” or ”educational measurement” or ”grade point average” or ”knowledge level” or “school mark*” or ”graduation rates” or ”school attendance” or ”school truancy” or ”school phobia” or ”school absenteeism” or ”school refusal” or ”school non-attendance” OR DE "Academic Underachievement" OR DE "Academic Overachievement" OR DE "Academic Failure")

Population

("kid" OR "kids" OR "kid's" OR "child" OR "childs" OR "child's" OR "children" OR "childhood" OR "child-hood" OR "schoolchild" OR "school-child" OR "schoolchilds" OR "school-childs" OR "schoolchild’s" OR "school-child's" OR "schoolchilden" OR "school-children" OR "juvenile" OR "preadolescent" OR "preadolescence" OR "preadolescents" OR "pre-adolescent" OR "pre-adolescence" OR "pre-adolescents" OR "Adolescent" OR "adolescence" OR "adolescent's" OR "adolescents" OR "youth" OR "youths" OR "teen" OR "teens" OR "teenage" OR "teen-age" OR "teenager" OR "teen-ager" OR "teenagers" OR "teen-agers" OR "schoolaged" OR "school-aged" OR "school-age" OR "schoolage" OR "compulsory-school" OR "kindergarten" OR "prekindergarten" OR "preschool" OR "preschoolers" OR "elementary-school" OR "grammar-school" OR "middle-school" OR "highschool" OR "high-school" OR "comprehensive-school" OR "secondary-school" OR "Intermediate-School" OR "Primary-School" OR "Nursery-School" OR "grade-6" OR "grade-six" OR "grade-7" OR "grade-seven" OR "grade-8" OR "grade-eight" OR "grade-9" OR "grade-nine" OR "grade-10" OR "grade-11" OR "grade-12" OR {Elementary School Students} OR {Elementary Schools} OR {High School Students} OR {High Schools} OR {Intermediate School Students} OR {Junior High School Students} OR {Junior High Schools} OR  {Middle School Students} OR {Middle Schools} OR {Nursery School Students} OR {Preschool Students} OR {Primary School Students})

Pain

("Psychosomatic" OR "psychomatics" OR "somatoform" OR "somatisation" OR "somatization" OR "pain-disorder" OR "pain-disorders" OR "recurrent-pain" OR "recurrent-pains" OR "chronic-pain" OR "chronic-pains" OR "persistent-pain" OR "persistent-pains" OR "ache" OR "aches" OR "Abdominal-pain" OR "Abdominal-pains" OR "stomach-ache" OR "stomachache" OR "stomach-aches" OR "stomachaches" OR "bellyache" OR "belly-ache" OR "bellyaches" OR "headache" OR "headaches" OR "back-ache" OR "backache" OR "back-aches" OR "backaches" OR "back-pain" OR "back-pains" OR "musculoskeletal-pain" OR "musculoskeletal-pains" OR "musculoskeletal-symptom" OR "musculoskeletal-symptoms" OR "fibromyalgia" OR "fibromyalgias" OR "widespread-pain" or "Chronic Pain" OR "Fibromyalgia" OR "Headache" OR "Chronic Pain"  OR  Fibromyalgia  OR  "Back Pain" OR Headache OR "Migraine Headache" OR "Muscle Contraction Headache" OR Somatization OR "Psychosomatic Medicine"  OR “Somatoform Disorders" OR "Somatoform Pain Disorder")

PubMed

# AcademicAchievement

“academic achievement*” [title/abstract] or ”academic overachievement*” [title/abstract] or ”school achievement*” [title/abstract] or ”scholastic achievement*” [title/abstract] or ”mathematics achievement*” [title/abstract] or ”reading achievement*” [title/abstract] or ”science achievement*” or “student achievement*” [title/abstract] or ”writing achievement*” [title/abstract] or ”literacy achievement*” [title/abstract] or ”cognitive achievement*" or “educational achievement*” or “learning achievement*” or “academic competence*” [title/abstract] or ”academic over competence*” [title/abstract] or ”school competence*” [title/abstract] or ”scholastic competence*” [title/abstract] or ”mathematics competence*” [title/abstract] or ”reading competence*” [title/abstract] or ”science competence*” or “student competence*” [title/abstract] or ”writing competence*” [title/abstract] or ”literacy competence*” [title/abstract] or ”cognitive competence*" or “educational competence*” or “learning competence*” or “academic skills*” or ”academic over skills*” [title/abstract] or ”school skills*” [title/abstract] or ”scholastic skills*” [title/abstract] or ”mathematics skills*” [title/abstract] or ”reading skills*” [title/abstract] or ”science skills*” or “student skills*” [title/abstract] or ”writing skills” [title/abstract] or ”literacy skills” [title/abstract] or ”cognitive skills" or “educational skills” or “learning skills" or “academic outcome*” or ”school outcome*” [title/abstract] or ”scholastic outcome*” [title/abstract] or ”mathematics outcome*” [title/abstract] or ”reading outcome*” [title/abstract] or ”science outcome*” or “student outcome*” [title/abstract] or ”writing outcome*” [title/abstract] or ”literacy outcome*” [title/abstract] or ”cognitive outcome*" or “educational outcome*”or “ learning outcome*” or “academic result*” or ”school result*” [title/abstract] or ”scholastic result*” [title/abstract] or ”mathematics result*” [title/abstract] or ”reading result*” [title/abstract] or ”science result*” or “student result*” [title/abstract] or ”writing result*” [title/abstract] or ”literacy result*” [title/abstract] or ”cognitive result*" or “educational result*” or “learning results” or “academic performance*” or ”academic over performance*” or ”school performance*” [title/abstract] or ”scholastic performance*” [title/abstract] or ”mathematics performance*” [title/abstract] or ”reading performance*” [title/abstract] or ”science performance*” or “student performance*” [title/abstract] or ”writing performance*” [title/abstract] or ”literacy performance*” [title/abstract] or ”cognitive performance*" or “educational performance*” or “academic attainment*” [title/abstract] or ”school attainment*” [title/abstract] or ”scholastic attainment*” [title/abstract] or ”mathematics attainment*” [title/abstract] or ”reading attainment*” [title/abstract] or ”science attainment*” or “student attainment*” [title/abstract] or ”writing attainment*” [title/abstract] or ”literacy attainment*” [title/abstract] or ”cognitive attainment*" or “educational attainment*” or “learning attainment*” or “academic characteristics*” [title/abstract] or ”school characteristics*” [title/abstract] or ”scholastic characteristics*” [title/abstract] or ”mathematics characteristics*” [title/abstract] or ”reading characteristics*” [title/abstract] or ”science characteristics*” or “student characteristics*” [title/abstract] or ”writing characteristics*” [title/abstract] or ”literacy characteristics*” [title/abstract] or ”cognitive characteristics*" or “educational characteristic*” or “learning characteristic*” or “academic capacity*” [title/abstract] or ”scholastic capacity*” [title/abstract] or ”mathematics capacity*” [title/abstract] or ”reading capacity*” [title/abstract] or ”science capacity*” or “student capacity*” [title/abstract] or ”writing capacity*” [title/abstract] or ”literacy capacity*” [title/abstract] or ”cognitive capacity*" or “educational capacity*” or “learning capacity” or “academic ability” [title/abstract] or ”school ability” [title/abstract] or ”scholastic ability” [title/abstract] or ”mathematics ability” [title/abstract] or ”reading ability” [title/abstract] or ”science ability” or “student ability” [title/abstract] or ”writing ability” [title/abstract] or ”literacy ability” [title/abstract] or ”cognitive ability" or “educational ability” or “learning ability” or “academic improvement*” [title/abstract] or ”school improvement*” [title/abstract] or ”scholastic improvement*” [title/abstract] or ”mathematics improvement*” [title/abstract] or ”reading improvement*” [title/abstract] or ”science improvement*” or “student improvement*” [title/abstract] or ”writing improvement*” [title/abstract] or ”literacy improvement*” [title/abstract] or ”cognitive improvement*" or “educational improvement*” or “learning improvement*” or “academic gain*” [title/abstract] or ”school gain*” [title/abstract] or ”scholastic gain*” [title/abstract] or ”mathematics gain*” [title/abstract] or ”reading gain*” [title/abstract] or ”science gain*” or “student gain*” [title/abstract] or ”writing gain*” [title/abstract] or ”literacy gain*” [title/abstract] or ”cognitive gain*" or “educational gain*” or “learning gain*” or “academic success*” [title/abstract] or ”school success*” [title/abstract] or ”scholastic success*” [title/abstract] or ”mathematics success*” [title/abstract] or ”reading success*” [title/abstract] or ”science success*” or “student success*” [title/abstract] or ”writing success*” [title/abstract] or ”literacy success*" or “educational success*” or “learning success” or “academic failure*”or ”school failure*” [title/abstract] or ”scholastic failure*” [title/abstract] or ”mathematics failure*” [title/abstract] or ”reading failure*” [title/abstract] or ”science failure*” or “student failure*” [title/abstract] or ”writing failure*” [title/abstract] or ”literacy failure*” [title/abstract] or ”cognitive failure*" or “educational failure*” or “learning failure” or “academic difficulties” [title/abstract] or ”school difficulties” [title/abstract] or ”scholastic difficulties” [title/abstract] or ”mathematics difficulties” [title/abstract] or ”reading difficulties” [title/abstract] or ”science difficulties” or “student difficulties” [title/abstract] or ”writing difficulties” [title/abstract] or ”literacy difficulties” [title/abstract] or ”cognitive difficulties" or “educational difficulties” or “learning difficulties” or “academic disorder*” [title/abstract] or ”school disorder*” [title/abstract] or ”scholastic disorder*” [title/abstract] or ”mathematics disorder*” [title/abstract] or ”reading disorder*” [title/abstract] or ”science disorder*” or ”writing disorder*” [title/abstract] or ”literacy disorder*" or “educational disorder*” or “learning disorder*” [title/abstract] or ”underachievement” [title/abstract] or ”low achievement” [title/abstract] or ”school completion” [title/abstract] or ”school graduation” or “school dropout” or ”school retention” or “academic retention” or “academic learning*” [title/abstract] or ”school learning*” [title/abstract] or ”scholastic learning*” [title/abstract] or ”mathematics learning*” [title/abstract] or ”reading learning*” [title/abstract] or ”science learning*” or “student learning*” [title/abstract] or ”writing learning*” [title/abstract] or ”literacy learning*” [title/abstract] or ”cognitive learning*" or “educational learning*” or “academic record*” [title/abstract] or ”school record*” [title/abstract] or ”scholastic record*” [title/abstract] or ”mathematics record*” [title/abstract] or ”reading record*” [title/abstract] or ”science record*” [title/abstract] or “student record*” [title/abstract] or ”writing record*” [title/abstract] or ”literacy record*” [title/abstract] or ”cognitive record*" [title/abstract] or “academic test*” [title/abstract] or ”school test*” [title/abstract] or ”scholastic test*” [title/abstract] or ”mathematics test*” [title/abstract] or ”reading test*” [title/abstract] or ”science test*” or “student test*” [title/abstract] or ”writing test*” [title/abstract] or ”literacy test*” [title/abstract] or ”cognitive test*" or “educational test*” [title/abstract] or “Achievement test*” [title/abstract] or “competence test*” [title/abstract] or “performance test*” [title/abstract] or ”test scores” [title/abstract] or ”achievement measures” [title/abstract] or ”educational standards” [title/abstract] or ”educational measurement” [title/abstract] or ”grade point average” [title/abstract] or ”knowledge level” or “school mark*” [title/abstract] or ”graduation rates” [title/abstract] or ”school attendance” [title/abstract] or ”school truancy” [title/abstract] or ”school phobia” [title/abstract] or ”school absenteeism” [title/abstract] or ”school refusal” [title/abstract] or ”school non-attendance” [title/abstract] OR "Absenteeism"[Mesh]

Population

"kid” [title/abstract] or ”kids” [title/abstract] or ”kid's” [title/abstract] or ”child” [title/abstract] or ”childs” [title/abstract] or ”child's” [title/abstract] or ”children” [title/abstract] or ”childhood” [title/abstract] or ”child-hood” [title/abstract] or ”schoolchild” [title/abstract] or ”school-child” [title/abstract] or ”schoolchilds” [title/abstract] or ”school-childs” [title/abstract] or ”schoolchild’s” [title/abstract] or ”school-child's” [title/abstract] or ”schoolchilden” [title/abstract] or ”school-children" OR "juvenile” [title/abstract] or ”preadolescent” [title/abstract] or ”preadolescence” [title/abstract] or ”preadolescents” [title/abstract] or ”pre-adolescent” [title/abstract] or ”pre-adolescence” [title/abstract] or ”pre-adolescents” [title/abstract] or ”Adolescent” [title/abstract] or ”adolescence” [title/abstract] or ”adolescent's” [title/abstract] or ”adolescents” [title/abstract] or ”youth” [title/abstract] or ”youths” [title/abstract] or ”teen” [title/abstract] or ”teens” [title/abstract] or ”teenage” [title/abstract] or ”teen-age” [title/abstract] or ”teenager” [title/abstract] or ”teen-ager” [title/abstract] or ”teenagers” [title/abstract] or ”teen-agers” [title/abstract] or ”schoolaged” [title/abstract] or ”school-aged” [title/abstract] or ”school-age” [title/abstract] or ”schoolage” [title/abstract] or ”compulsory-school” [title/abstract] or ”kindergarten” [title/abstract] or ”prekindergarten” [title/abstract] or ”preschool” [title/abstract] or ”preschoolers” [title/abstract] or ”elementary-school” [title/abstract] or ”grammar-school” [title/abstract] or ”middle-school” [title/abstract] or ”highschool” [title/abstract] or ”high-school” [title/abstract] or ”comprehensive-school” [title/abstract] or ”secondary-school” [title/abstract] or ”Intermediate-School” [title/abstract] or ”Primary-School” [title/abstract] or ”Nursery-School” [title/abstract] or ”grade-6” [title/abstract] or ”grade-six” [title/abstract] or ”grade-7” [title/abstract] or ”grade-seven” [title/abstract] or ”grade-8” [title/abstract] or ”grade-eight” [title/abstract] or ”grade-9” [title/abstract] or ”grade-nine” [title/abstract] or ”grade-10” [title/abstract] or ”grade-11” [title/abstract] or ”grade-12" [title/abstract] OR Infant[Mesh:noexp] OR Child[Mesh] OR Adolescent[Mesh]

Pain

"Psychosomatic” [title/abstract] or ”psychomatics” [title/abstract] or ”somatoform” [title/abstract] or ”somatisation” [title/abstract] or ”somatization” [title/abstract] or ”pain-disorder” [title/abstract] or ”pain-disorders” [title/abstract] or ”recurrent-pain” [title/abstract] or ”recurrent-pains” [title/abstract] or ”chronic-pain” [title/abstract] or ”chronic-pains” [title/abstract] or ”persistent-pain” [title/abstract] or ”persistent-pains” [title/abstract] or ”ache” [title/abstract] or ”aches” [title/abstract] or ”Abdominal-pain” [title/abstract] or ”Abdominal-pains” [title/abstract] or ”stomach-ache” [title/abstract] or ”stomachache” [title/abstract] or ”stomach-aches” [title/abstract] or ”stomachaches” [title/abstract] or ”bellyache” [title/abstract] or ”belly-ache” [title/abstract] or ”bellyaches” [title/abstract] or ”headache” [title/abstract] or ”headaches” [title/abstract] or ”back-ache” [title/abstract] or ”backache” [title/abstract] or ”back-aches” [title/abstract] or ”backaches” [title/abstract] or ”back-pain” [title/abstract] or ”back-pains” [title/abstract] or ”musculoskeletal-pain” [title/abstract] or ”musculoskeletal-pains” [title/abstract] or ”musculoskeletal-symptom” [title/abstract] or ”musculoskeletal-symptoms” [title/abstract] or ”fibromyalgia” [title/abstract] or ”fibromyalgias” [title/abstract] or ”widespread-pain” [title/abstract] or ”Chronic Pain" OR "Fibromyalgia” [title/abstract] or ”Headache” [title/abstract] or ”Psychosomatic Medicine"[Mesh] OR "Somatoform Disorders"[Mesh] OR "Abdominal Pain"[Mesh:noexp] OR "Headache Disorders, Primary "[Mesh] OR "Headache"[Mesh] OR "back pain "[Mesh] OR "Fibromyalgia"[Mesh]

Web of Science

# AcademicAchievement

(“academic achievement*” or ”academic overachievement*” or ”school achievement*” or ”scholastic achievement*” or ”mathematics achievement*” or ”reading achievement*” or ”science achievement*” or “student achievement*” or ”writing achievement*” or "literacy achievement*" or "cognitive achievement*" or “educational achievement*” or “learning achievement*” or “academic competence*” or ”academic over competence*” or ”school competence*” or ”scholastic competence*” or ”mathematics competence*” or ”reading competence*” or ”science competence*” or “student competence*” or ”writing competence*” or "literacy competence*" or "cognitive competence*" or “educational competence*” or “learning competence*” or “academic skills*” or ”academic over skills*” or ”school skills*” or ”scholastic skills*” or ”mathematics skills*” or ”reading skills*” or ”science skills*” or “student skills*” or ”writing skills” or "literacy skills" or "cognitive skills" or “educational skills” or “learning skills" or “academic outcome*” or ”school outcome*” or ”scholastic outcome*” or ”mathematics outcome*” or ”reading outcome*” or ”science outcome*” or “student outcome*” or ”writing outcome*” or "literacy outcome*" or "cognitive outcome*" or “educational outcome*”or “ learning outcome*” or “academic result*” or ”school result*” or ”scholastic result*” or ”mathematics result*” or ”reading result*” or ”science result*” or “student result*” or ”writing result*” or "literacy result*" or "cognitive result*" or “educational result*” or “learning results” or “academic performance*” or ”academic over performance*” or ”school performance*” or ”scholastic performance*” or ”mathematics performance*” or ”reading performance*” or ”science performance*” or “student performance*” or ”writing performance*” or "literacy performance*" or "cognitive performance*" or “educational performance*” or “academic attainment*” or ”school attainment*” or ”scholastic attainment*” or ”mathematics attainment*” or ”reading attainment*” or ”science attainment*” or “student attainment*” or ”writing attainment*” or "literacy attainment*" or "cognitive attainment*" or “educational attainment*” or “learning attainment*” or “academic characteristics*” or ”school characteristics*” or ”scholastic characteristics*” or ”mathematics characteristics*” or ”reading characteristics*” or ”science characteristics*” or “student characteristics*” or ”writing characteristics*” or "literacy characteristics*" or "cognitive characteristics*" or “educational characteristic*” or “learning characteristic*” or “academic capacity*” or ”scholastic capacity*” or ”mathematics capacity*” or ”reading capacity*” or ”science capacity*” or “student capacity*” or ”writing capacity*” or "literacy capacity*" or "cognitive capacity*" or “educational capacity*” or “learning capacity” or “academic ability” or ”school ability” or ”scholastic ability” or ”mathematics ability” or ”reading ability” or ”science ability” or “student ability” or ”writing ability” or "literacy ability" or "cognitive ability" or “educational ability” or “learning ability” or “academic improvement*” or ”school improvement*” or ”scholastic improvement*” or ”mathematics improvement*” or ”reading improvement*” or ”science improvement*” or “student improvement*” or ”writing improvement*” or "literacy improvement*" or "cognitive improvement*" or “educational improvement*” or “learning improvement*” or “academic gain*” or ”school gain*” or ”scholastic gain*” or ”mathematics gain*” or ”reading gain*” or ”science gain*” or “student gain*” or ”writing gain*” or "literacy gain*" or "cognitive gain*" or “educational gain*” or “learning gain*” or “academic success*” or ”school success*” or ”scholastic success*” or ”mathematics success*” or ”reading success*” or ”science success*” or “student success*” or ”writing success*” or "literacy success*" or “educational success*” or “learning success” or “academic failure*”or ”school failure*” or ”scholastic failure*” or ”mathematics failure*” or ”reading failure*” or ”science failure*” or “student failure*” or ”writing failure*” or "literacy failure*" or "cognitive failure*" or “educational failure*” or “learning failure” or “academic difficulties” or ”school difficulties” or ”scholastic difficulties” or ”mathematics difficulties” or ”reading difficulties” or ”science difficulties” or “student difficulties” or ”writing difficulties” or "literacy difficulties" or "cognitive difficulties" or “educational difficulties” or “learning difficulties” or “academic disorder*” or ”school disorder*” or ”scholastic disorder*” or ”mathematics disorder*” or ”reading disorder*” or ”science disorder*” or ”writing disorder*” or "literacy disorder*" or “educational disorder*” or “learning disorder*” or "underachievement" or "low achievement" or ”school completion” or ”school graduation” or “school dropout” or ”school retention” or “academic retention” or “academic learning*” or ”school learning*” or ”scholastic learning*” or ”mathematics learning*” or ”reading learning*” or ”science learning*” or “student learning*” or ”writing learning*” or "literacy learning*" or "cognitive learning*" or “educational learning*” or “academic record*” or ”school record*” or ”scholastic record*” or ”mathematics record*” or ”reading record*” or ”science record*” or “student record*” or ”writing record*” or "literacy record*" or "cognitive record*" or “academic test*” or ”school test*” or ”scholastic test*” or ”mathematics test*” or ”reading test*” or ”science test*” or “student test*” or ”writing test*” or "literacy test*" or "cognitive test*" or “educational test*” or “Achievement test*” or “competence test*” or “performance test*” or ”test scores” or ”achievement measures” or ”educational standards” or ”educational measurement” or ”grade point average” or ”knowledge level” or “school mark*” or ”graduation rates” or ”school attendance” or ”school truancy” or ”school phobia” or ”school absenteeism” or ”school refusal” or ”school non-attendance”)

Population

("kid" OR "kids" OR "kid's" OR "child" OR "childs" OR "child's" OR "children" OR "childhood" OR "child-hood" OR "schoolchild" OR "school-child" OR "schoolchilds" OR "school-childs" OR "schoolchild’s" OR "school-child's" OR "schoolchilden" OR "school-children" OR "juvenile" OR "preadolescent" OR "preadolescence" OR "preadolescents" OR "pre-adolescent" OR "pre-adolescence" OR "pre-adolescents" OR "Adolescent" OR "adolescence" OR "adolescent's" OR "adolescents" OR "youth" OR "youths" OR "teen" OR "teens" OR "teenage" OR "teen-age" OR "teenager" OR "teen-ager" OR "teenagers" OR "teen-agers" OR "schoolaged" OR "school-aged" OR "school-age" OR "schoolage" OR "compulsory-school" OR "kindergarten" OR "prekindergarten" OR "preschool" OR "preschoolers" OR "elementary-school" OR "grammar-school" OR "middle-school" OR "highschool" OR "high-school" OR "comprehensive-school" OR "secondary-school" OR "Intermediate-School" OR "Primary-School" OR "Nursery-School" OR "grade-6" OR "grade-six" OR "grade-7" OR "grade-seven" OR "grade-8" OR "grade-eight" OR "grade-9" OR "grade-nine" OR "grade-10" OR "grade-11" OR "grade-12")

Pain

("Psychosomatic" OR "psychomatics" OR "somatoform" OR "somatisation" OR "somatization" OR "pain-disorder" OR "pain-disorders" OR "recurrent-pain" OR "recurrent-pains" OR "chronic-pain" OR "chronic-pains" OR "persistent-pain" OR "persistent-pains" OR "ache" OR "aches" OR "Abdominal-pain" OR "Abdominal-pains" OR "stomach-ache" OR "stomachache" OR "stomach-aches" OR "stomachaches" OR "bellyache" OR "belly-ache" OR "bellyaches" OR "headache" OR "headaches" OR "back-ache" OR "backache" OR "back-aches" OR "backaches" OR "back-pain" OR "back-pains" OR "musculoskeletal-pain" OR "musculoskeletal-pains" OR "musculoskeletal-symptom" OR "musculoskeletal-symptoms" OR "fibromyalgia" OR "fibromyalgias" OR "widespread-pain" or "Chronic Pain" OR "Fibromyalgia" OR "Headache")
